# Supplementary material
Source: PubMed Central journal article supplement (PMC3081694)
Supplement: NIHMS251758-supplement-Appendix.pdf [file NIHMS251758-supplement-Appendix.pdf]

## **Online Appendix for the following April 6, 2010 *JACC* article**

**TITLE:** Adenylyl Cyclase 6 Deletion Reduces LV Hypertrophy, Dilation, Dysfunction and Fibrosis in Pressure-overloaded Female Mice

**AUTHORS:** Tong Tang, PhD, N. Chin Lai, PhD, H. Kirk Hammond, MD, David M. Roth, MD, PhD, Yuan Yang, MD, Tracy Guo, BS, Mei Hua Gao, PhD

---

### **APPENDIX**

#### **METHODS**

**LV Physiological Study.** A 1.4F conductance-micromanometer catheter was used to measure LV hemodynamics using a closed chest method, as previously reported (1).

For the LV physiological study, we used pentobarbital in a higher amount than has been used in previous studies (2). Indeed, 100 mg/kg (intraperitoneal) pentobarbital was required to obtain a deep level of anesthesia, since many animals were semiconscious at lower doses. The LV pressure, obtained during measurement of the pressure-volume relationship, reflects the cardiodepressant effect of pentobarbital. Indeed, 1-2 days prior to the terminal study from which the LV pressure was assessed, we examined transaortic flow rates by Doppler echocardiography. In these studies, we used 1% isoflurane, which is associated with far less negative inotropic effects compared to pentobarbital. These studies documented that blood flow velocity exceeded 4 m/s in almost all cases, indicating a gradient of >64 mm Hg and a substantial pressure load. Finally, LV-to-tibial-length ratios were increased by 60%, which is a similar degree of

LV hypertrophy reported 3 weeks after TAC by others, thereby documenting similar pressure stress (3).

**Quantitative RT-PCR.** Total RNA was extracted from mouse LV samples using RNA STAT-60 (Tel-Test Inc., Friendswood, TX), treated with RNase-free DNase to eliminate genomic DNA contamination, and purified with RNeasy Mini kit (Qiagen, Valencia, CA). cDNA was synthesized from 4 µg total RNA by reverse transcription reaction using SuperScript II reverse transcriptase (Invitrogen, Carlsbad, CA) and random hexamers (Invitrogen). The primer pairs used for quantitative RT-PCR analysis of adenylyl cyclase (AC) isoforms (AC2, 3, 4, 5, 7, and 9) were as previously reported (4). Other primer pairs used were:

ANF: forward 5'-CCTCGTCTTGGCCTTTTGG-3'

reverse 5'-CATCTTCTACCGGCATCTTC-3'

α-SK actin: forward 5'-GTGTCACCCACAACGTGC-3'

reverse 5'-AGGGCCACATAGCACAGC-3'

β-MHC: forward 5'-GCTGAAAGCAGAAAGAGATTATC-3'

reverse 5'-TGGAGTTCTTCTCTTCTGGAG-3'

collagen I α1 chain: forward 5'-GCCAAGAAGACATCCCTGAAG-3'

reverse 5'-GGGTCCTCGACTCCTAC-3'

collagen III α1 chain: forward 5'-GCACAGCAGTCCAACGTAGA-3'

reverse 5'-TCTCCAAATGGGATCTCTGG-3';

FHL1: forward 5'-TGCAACAAGTGCGCTACTCG-3'

reverse 5'-CAATGTTTGGCGAACTTGGTC-3',

periostin: forward 5'-CAGCGGGTCATGGCTAAC-3'

reverse 5'-CAGCTTGCCATCTTGGAGTC-3'

Quantitative real-time PCR was conducted on a Mx3000P QPCR System (Stratagene, La Jolla, CA) using iQ SYBR Green Supermix (Bio-Rad, Hercules, CA) under the following conditions: 5 min at 98°C, 40 cycles of 30 s at 95°C, 30s at 55°C, and 30s at 72°C. RNA equivalents were normalized to simultaneously determined glyceraldehyde-3-phosphate dehydrogenase (GAPDH) mRNA levels in each sample. Relative RNA in LV samples from AC6-KO mice was compared to that from CON mice. Specificity of each RT-PCR reaction was checked by its dissociation curve. Single product amplification and correct product size were confirmed by agarose gel electrophoresis.

For quantitative RT-PCR using RNA from neonatal rats, the primer pairs were used:

AC6: forward 5'-GTCTTTCCACCCTGCATTG-3'

reverse 5'-GTAACCACGGGTCTCCTGAA-3'

ANF: forward 5'-GTATACAGTGCGGTGTCCAAC-3'

reverse 5'-GAGAGCACCTCCATCTCTC-3'

β-MHC: forward 5'-GCTGAAAGCAGAAAGAGATTATC-3'

reverse 5'-TGGAGTTCTTCTTCTTCTGGAG-3'

collagen I α1 chain: forward 5'-GCCAAGAAGACATCCCTGAAG-3'

reverse 5'-CTTCTGGGCAGAAAGGACAG-3'

collagen III α1 chain: forward 5'-GGTTTCTTCTCACCTGCTTC-3'

reverse 5'-TCTCCAAATGGGATCTCTGG-3';

**Western Blotting.** LV samples were homogenized at 4°C in homogenization buffer (25 mmol/L Tris-HCl, pH 7.4, 0.5 mmol/L EDTA, 0.5 mmol/L EGTA, 50 mmol/L  $\beta$ -glycerophosphate, 1 mmol/L  $\text{Na}_3\text{VO}_4$ ) in the presence of protease inhibitor cocktail (Roche, Indianapolis, IN). Samples were denatured in Laemmli buffer and subjected to SDS-PAGE. After electrophoresis, proteins were electrotransferred to polyvinylidene difluoride membranes (Bio-Rad, Hercules, CA), which were incubated in blocking buffer (5% milk, 20 mmol/L Tris-HCl, pH 7.5, 150 mmol/L NaCl, 0.1% Tween 20) for 1 h and then incubated overnight with the antibodies for FHL1 (four and a half LIM domains 1; Cat # EB06507, Everest Biotech Ltd., Oxfordshire, UK), periostin (Cat # AF2955, R&D Systems, Minneapolis, MN), PDE3A (Cat # sc-20792, Santa Cruz Biotechnology, Santa Cruz, CA), PDE4 (Cat # PD4-101AP, Frisco, TX). Binding of the primary antibody was detected by an enhanced chemiluminescence method ( $\text{ECL}^+$ , Amersham Biosciences, Piscataway, NJ) using horseradish peroxidase-conjugated donkey anti-goat IgG or goat anti-rabbit IgG (Santa Cruz Biotechnology, Santa Cruz, CA). Reprobing stripped blots with GAPDH antibody enabled evaluation of equal loading and transfer efficiency. Quantification of protein expression was performed using Gel-Pro<sup>®</sup> Analyzer (Media Cybernetics, Silver Spring, MD).

**Gelatin Zymography.** LV homogenates were denatured in Laemmli buffer containing no  $\beta$ -mercaptoethanol and used for gelatin zymography (5).

## RESULTS

We assessed LV protein contents of PDE3A and PDE4D, two important cAMP-hydrolyzing phosphodiesterases in cardiac myocytes, in CON and AC6-deleted mice 3w after TAC. We found that AC6 deletion did not alter protein contents of PDE3A [CON:  $493 \pm 152$  densitometric units (du), AC6KO:  $414 \pm 66$  du;  $p=0.64$ ,  $n=8$  for both groups] and PDE4D (CON:  $636 \pm 67$  du, AC6KO:  $685 \pm 107$  du;  $p=0.70$ ,  $n=8$  for both groups).

We also found that AC6 deletion did not alter mRNA contents of AC isoforms (AC2, 3, 4, 5, 7, and 9) in pressure overloaded hearts (Figure).

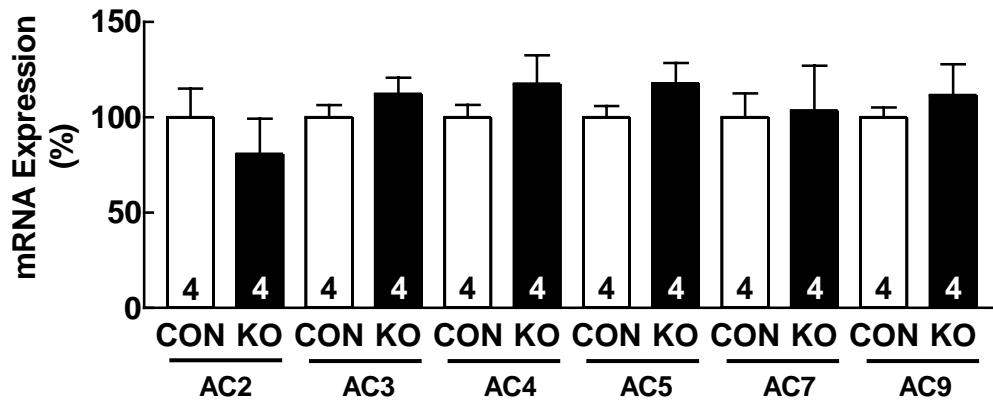

**Figure** AC6 deletion did not alter mRNA contents of AC2, AC3, AC4, AC5, AC7, and AC9 in pressure overloaded hearts. Error bars denote 1 SE; numbers in bars indicate group size.

To identify the abnormalities associated with early death observed in male AC6-KO mice, we conducted echocardiographic studies on males and females 1w after TAC. The male AC6-deleted mice already show greater LV dilation and decreased function vs the females (Table). Expression of FHL1 and periostin mRNA was also higher in male AC-KO mice than females 1w after TAC.

|                                                                                                                                                                                                                                                                                                                                                                | <b>Female AC6-KO</b><br><b>1w after TAC</b> | <b>Male AC6-KO</b><br><b>1w after TAC</b> | <b>p</b> |
|----------------------------------------------------------------------------------------------------------------------------------------------------------------------------------------------------------------------------------------------------------------------------------------------------------------------------------------------------------------|---------------------------------------------|-------------------------------------------|----------|
| <b>EDD (mm)</b>                                                                                                                                                                                                                                                                                                                                                | 3.2±0.1 <sup>A</sup>                        | 4.4±0.5 <sup>B</sup>                      | 0.06     |
| <b>ESD (mm)</b>                                                                                                                                                                                                                                                                                                                                                | 2.2±0.1 <sup>A</sup>                        | 3.8±0.2 <sup>B</sup>                      | 0.0001   |
| <b>EF (%)</b>                                                                                                                                                                                                                                                                                                                                                  | 61±4 <sup>A</sup>                           | 26±13 <sup>B</sup>                        | 0.04     |
| <b>Vcf (cir/s)</b>                                                                                                                                                                                                                                                                                                                                             | 6.1±0.6 <sup>C</sup>                        | 2.6±1.4 <sup>A</sup>                      | 0.06     |
| <b>LV/TL</b><br><b>(mg/mm)</b>                                                                                                                                                                                                                                                                                                                                 | 6.1±1.8 <sup>A</sup>                        | 8.9±1.4 <sup>B</sup>                      | 0.23     |
| <b>ANF</b>                                                                                                                                                                                                                                                                                                                                                     | 100±25% <sup>C</sup>                        | 119±10% <sup>D</sup>                      | 0.48     |
| <b>α-SK actin</b>                                                                                                                                                                                                                                                                                                                                              | 100±19% <sup>C</sup>                        | 130±23% <sup>D</sup>                      | 0.32     |
| <b>β-MHC</b>                                                                                                                                                                                                                                                                                                                                                   | 100±49% <sup>C</sup>                        | 79±30% <sup>D</sup>                       | 0.71     |
| <b>FHL1</b>                                                                                                                                                                                                                                                                                                                                                    | 100±15% <sup>C</sup>                        | 160±18% <sup>D</sup>                      | 0.02     |
| <b>periostin</b>                                                                                                                                                                                                                                                                                                                                               | 100±33% <sup>C</sup>                        | 187±26% <sup>D</sup>                      | 0.05     |
| <p>EDD, end-diastolic diameter; ESD, end-diastolic dimension; EF, left ventricular ejection fraction; Vcf, velocity of circumferential fiber shortening, LV/TL, left ventricle weight to tibial length ratio. P values are from Student's t test (2-tailed). Entries denote mean±SE. <sup>A</sup>n=10; <sup>B</sup>n=14; <sup>C</sup>n=7; <sup>D</sup>n=8.</p> |                                             |                                           |          |

## REFERENCES

1. Lai NC, Tang T, Gao MH, et al. Activation of cardiac adenylyl cyclase expression increases function of the failing ischemic heart in mice. *J Am Coll Cardiol* 2008;51:1490-7.
2. Pacher P, Nagayama T, Mukhopadhyay P, et al. Measurement of cardiac function using pressure-volume conductance catheter technique in mice and rats. *Nat Protoc* 2008;3:1422-34.
3. Hsu S, Nagayama T, Koitabashi N, et al. Phosphodiesterase 5 inhibition blocks pressure overload-induced cardiac hypertrophy independent of the calcineurin pathway. *Cardiovasc Res* 2009;81:301-9.
4. Tang T, Gao MH, Lai NC, et al. Adenylyl cyclase type 6 deletion decreases left ventricular function via impaired calcium handling. *Circulation* 2008;117:61-69.
5. Senzaki H, Gluzband Y, Pak PH, et al. Synergistic exacerbation of diastolic stiffness from short-term tachycardia-induced cardiodepression and angiotensin II. *Circ Res* 1998;82:503-512.
